# Supplementary material
Source: PubMed Central journal article supplement (PMC4263436)
Supplement: bi501111j_si_001.pdf [file bi501111j_si_001.pdf]

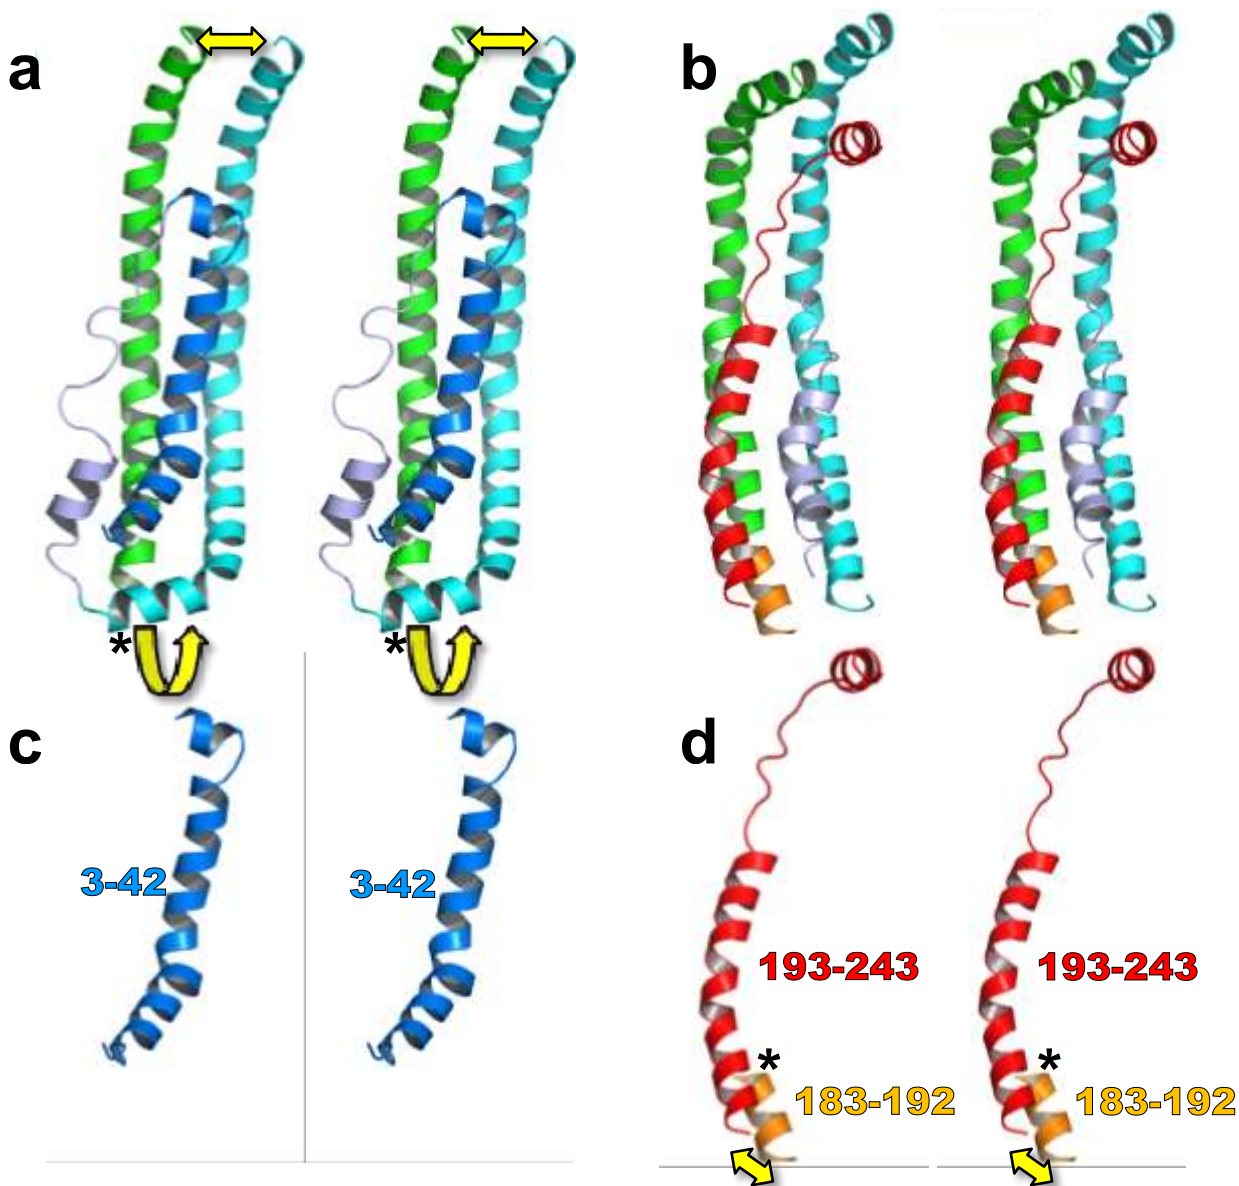

**Fig. S1. Initial monomers created from different chains of two crystal structures, C-terminally truncated ( $\Delta 185-243$ )apoA-I and N-terminally truncated ( $\Delta 1-43$ )apoA-I.** **a.** Relaxed-eye stereo view of initial monomer created from C-terminally truncated ( $\Delta 185-243$ )apoA-I. Residues 3-42, blue; residues 43-67, purple; residues 68-130, cyan; residues 131-182, green. Residues 3-130 are from Chain A and residues 131-182 are from Chain B. Yellow double headed arrow denotes joining of residue 130 to 131 to complete helical repeat 5 hairpin. Yellow arrow hairpin denotes where missing residues after 182 wrap around helical segment 71-80 at the bottom. \* denotes where residue 182 joins with 183 in (d). **b.** Relaxed-eye stereo view of initial monomer created from N-terminally truncated ( $\Delta 1-43$ )apoA-I. Residues 43-67 (Chain A), purple; residues 68-130 (Chain D), cyan; residues 131-182 (Chain C), green; residues 183-192 (Chain C), orange; residues 193-243 (Chain B), red. **c.** Relaxed-eye stereo view of residues 3-42 from ( $\Delta 185-243$ )apoA-I (Chain A) isolated from (a) and missing in (b). **d.** Relaxed-eye stereo view of residues 183-243 from ( $\Delta 1-43$ )apoA-I (Chains C and B) isolated from (b) and missing in (a). The yellow arrow shows where a hairpin turn is required to join residue 192 to 193. \* denotes where residue 183 joins with 182 in (a).

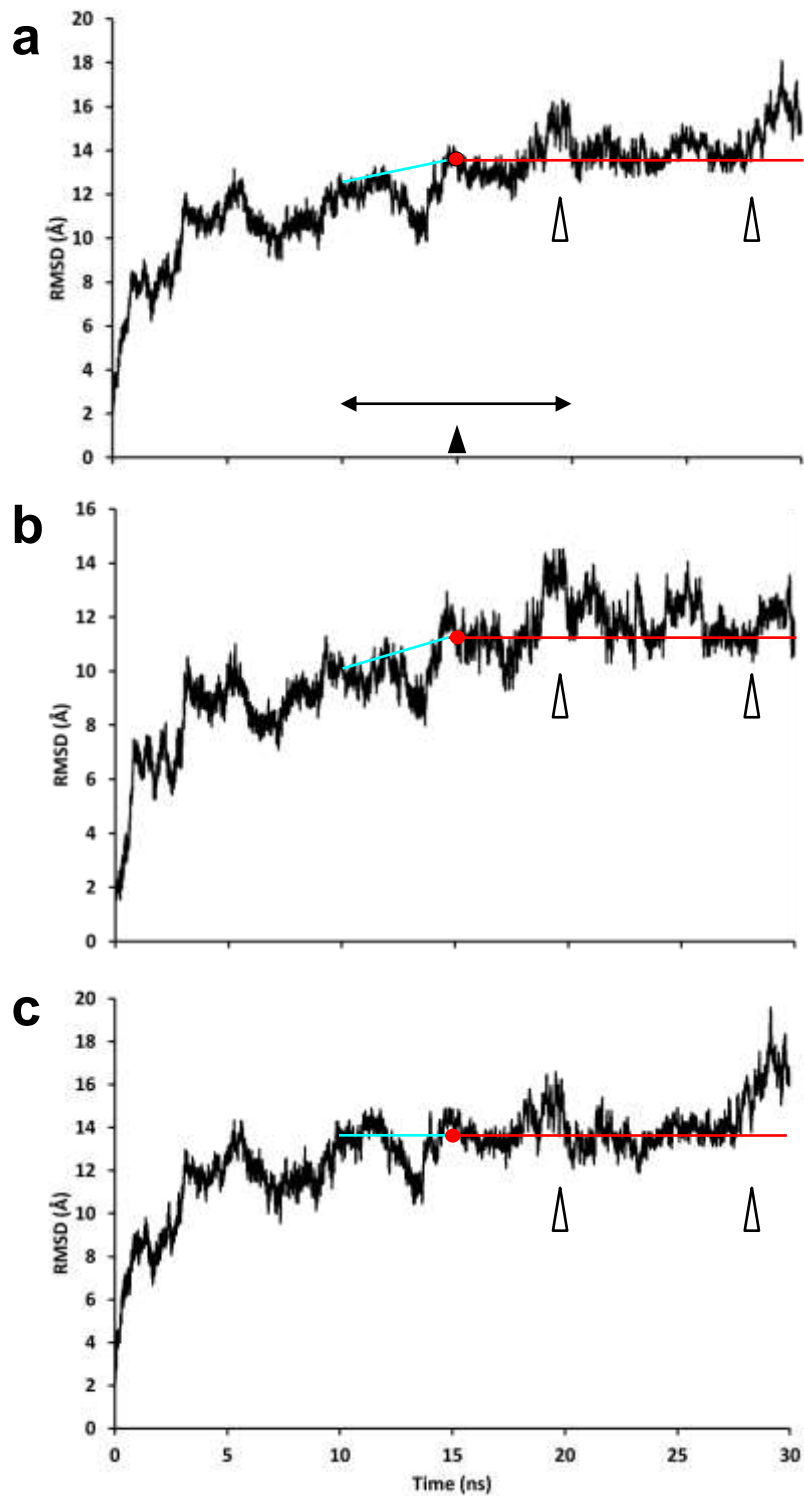

**Fig. S2. Plots of changes in RMSD of the initial crystal model during 30 ns of MD simulation at 500 K.** 10-15 ns trend line, cyan; 15-30 ns trend line, red. **a.** RMSD of the  $C\alpha$  of all residues plotted over time of simulation. Open arrowheads, RMSD changes induced by open structures. Double arrow, 10–20 ns interval. Closed arrowhead, 15 ns simulation. **b.** RMSD of the  $C\alpha$  of the CH domains 1, 4 and 5 (residues 7-44, 81-115 and 147-178) **c.** RMSD of the  $C\alpha$  of all non-CH domains, which includes several helical regions.

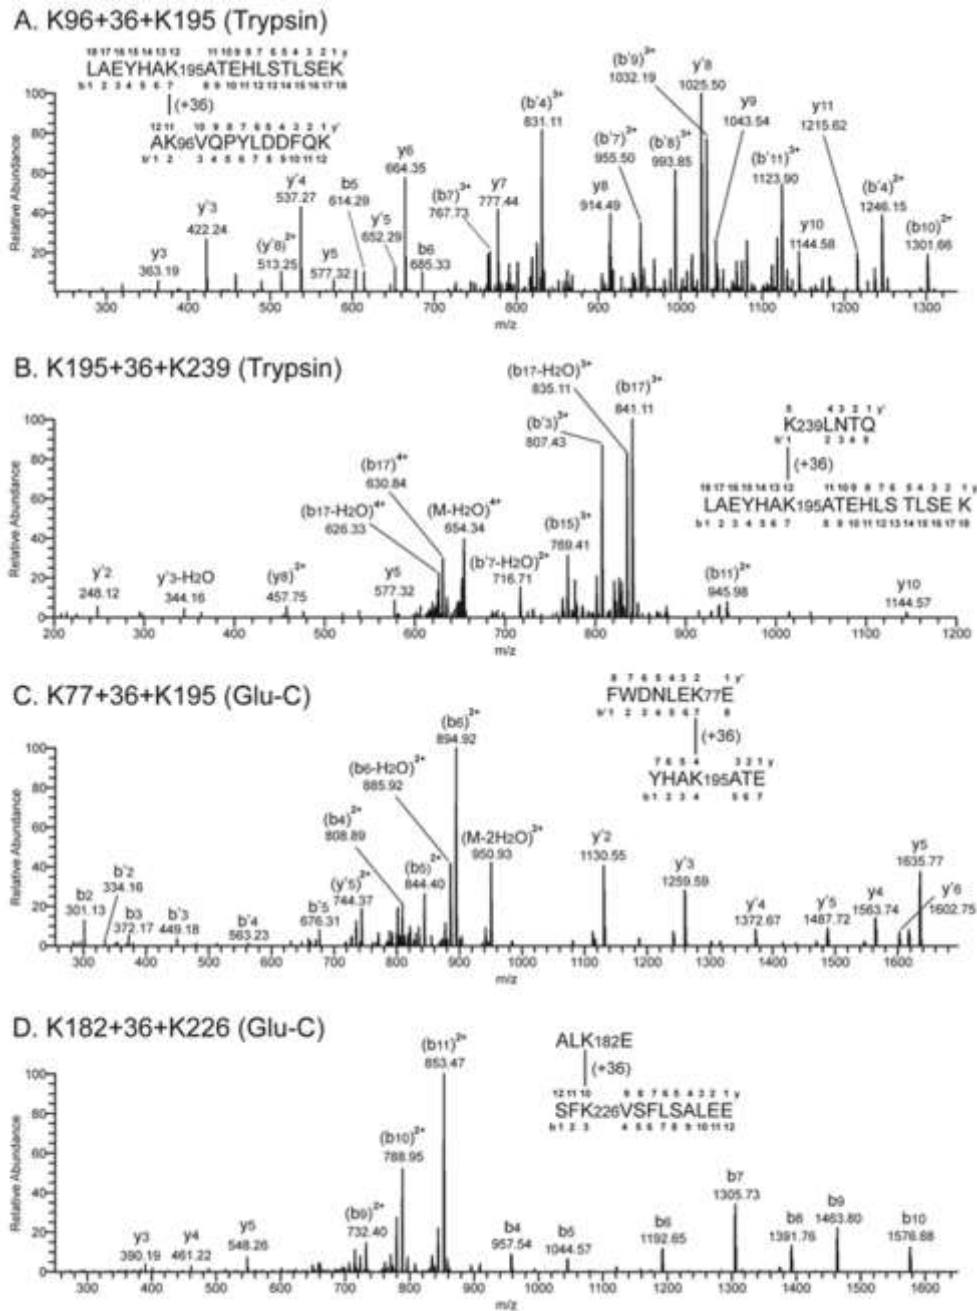

**Fig. S3. MS/MS analysis of Lys-MDA-Lys (K+36+K) in MDA-modified apoA-I.** Lipid-free apoA-I was exposed to a 20-fold molar excess of MDA. Glu-C peptide digest and trypsin peptide digests were analyzed by LC-ESI-MS/MS, as described in Methods. (A) MS/MS spectrum of peptides consisting of L189-K206 and A95-K106 containing an inter-peptide MDA link (36 amu) between K195 and K96. (B) MS/MS spectrum of peptides consisting of L189-K206 and K239-Q243 containing an inter-peptide MDA link between K195 and K239. (C) MS/MS spectrum of peptides consisting of F71-E78 and Y192-E198 containing an inter-peptide MDA link between K77 and K195. (D) MS/MS spectrum of A180-E183 and S224-E235 containing an inter-chain MDA link between K182 and K226.

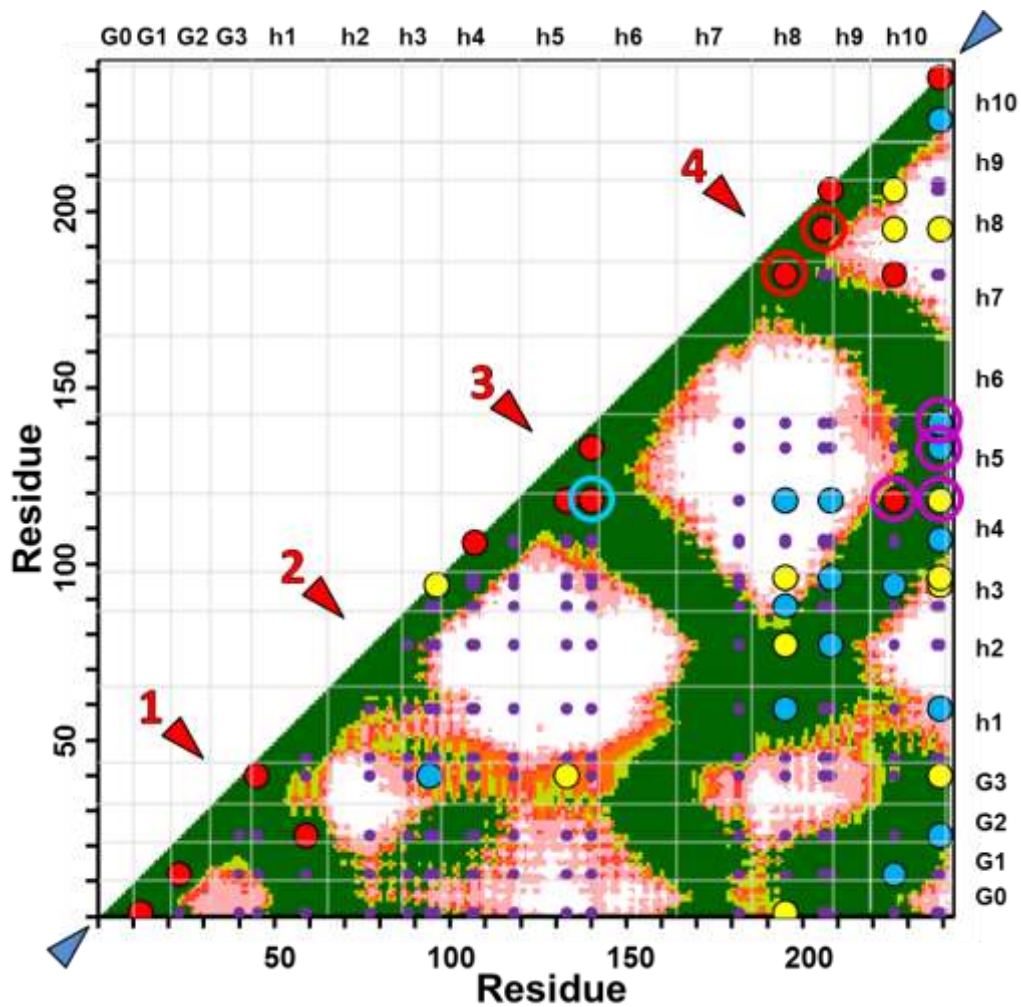

**Fig. S4.** Overlay of 41 chemical cross-linking data points onto the contact map plot of  $C\alpha$  distances  $\leq 23 \text{ \AA}$  for the full trajectory of the 30 ns MD simulation. Small purple circles represent the position of all potential cross-links. Red circles, most probable one-third of cross-links; yellow circles, median probable one-third of cross-links; blue, least probable one-third of cross-links. Red arrowheads, loops and turns; blue arrowheads, N- and C-termini. Bulls' eyes, same as in **Fig. 4b**.

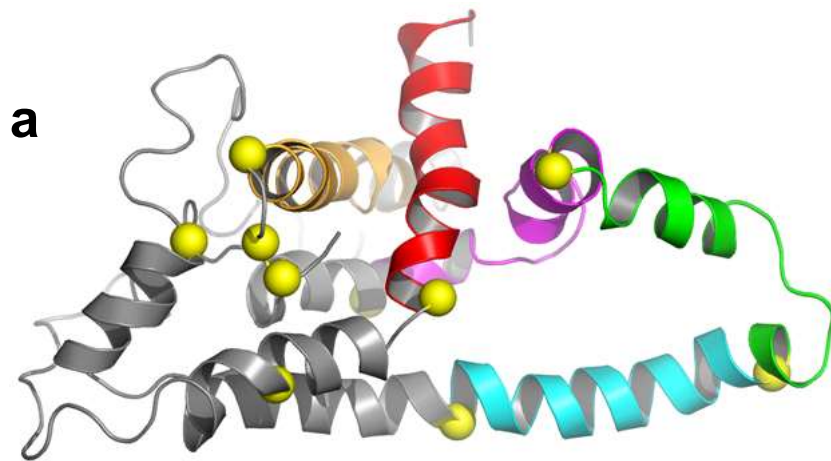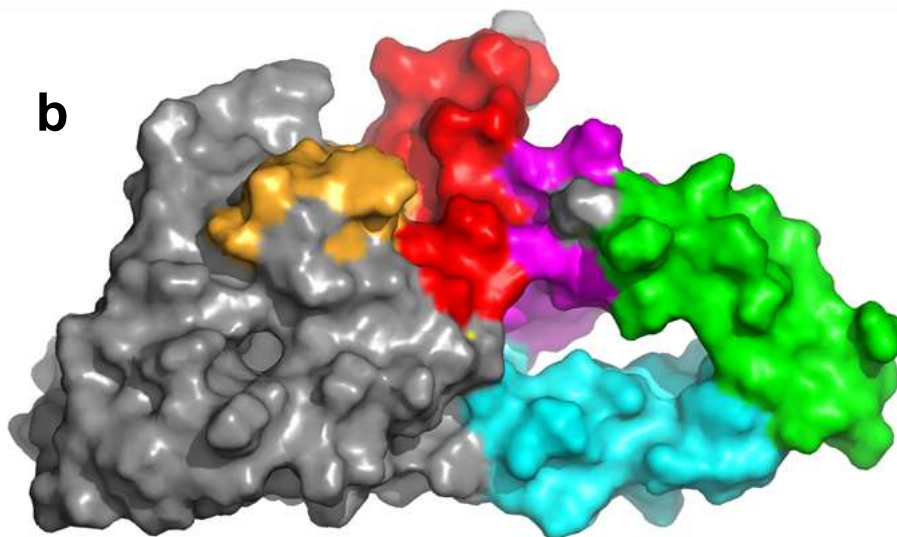

**Fig. S5. Depth cued molecular graphics representation of the 30 ns structure. CH1, gold; H4, cyan; H5, green; H6, magenta; H10, red. a. Ribbons model. b. Surface representation.**

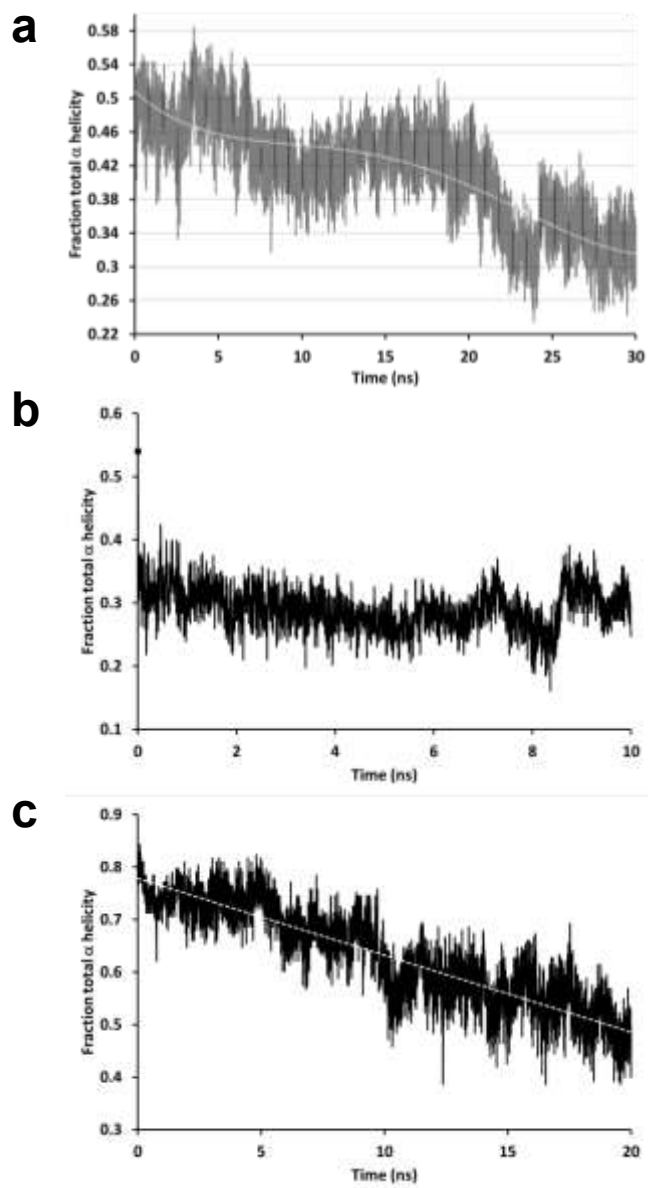

**Fig. S6. Plots of changes in helicity of two published monomeric apoA-I models and one control four helix bundle apolipoprotein during MD simulation at 500 K. a.** Change in fraction total  $\alpha$  helicity during 30 ns MD simulation of model Silva <sup>1</sup>. **b.** Change in fraction total  $\alpha$  helicity during 10 ns MD simulation of model Pollard <sup>2</sup>. **c.** Change in fraction total  $\alpha$  helicity during 20 ns MD simulation of the four helix bundle apolipophorin III crystal structure <sup>3</sup>.

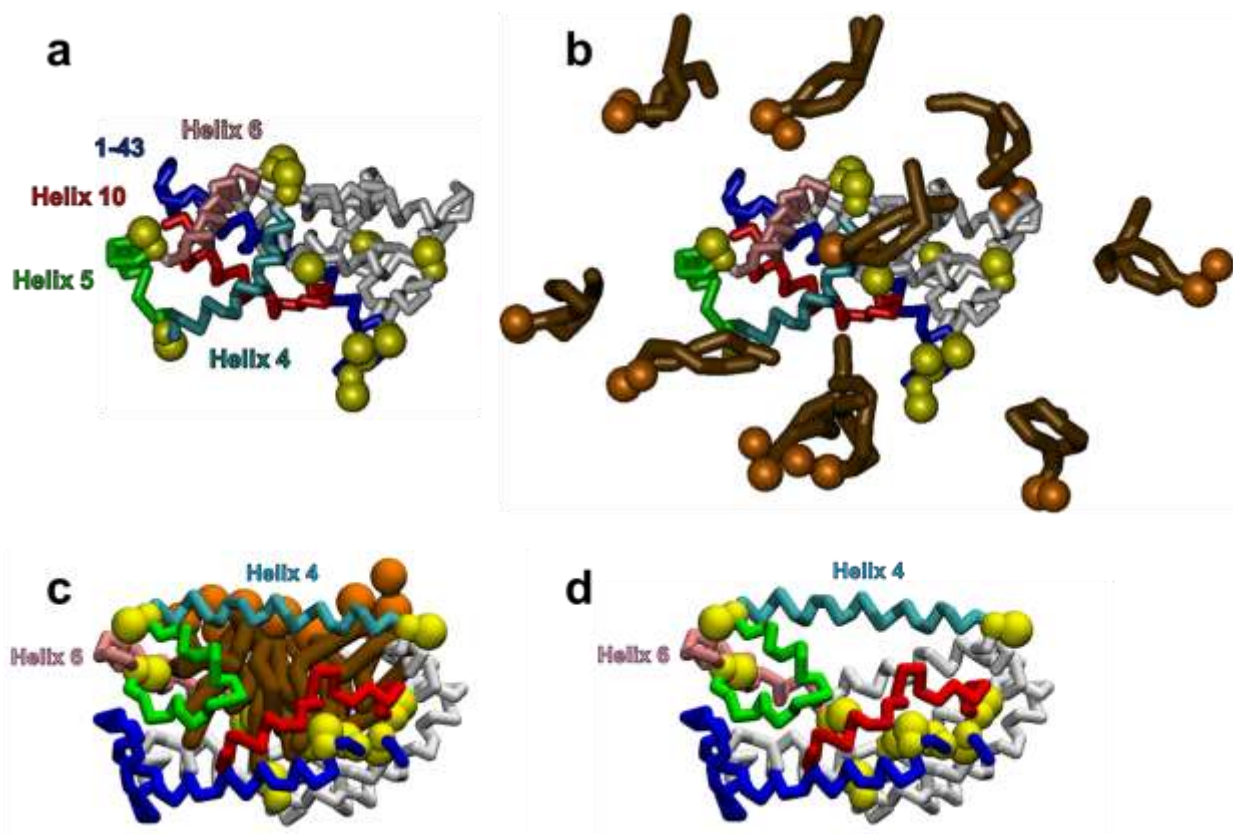

**Fig. S7. "Cup" model derived by coarse grained MD simulation of interaction of PL with lipid-free apoA-I monomer.** Course grained (CG) apoA-I monomer with flexible secondary structure and CG POPC simulated as described<sup>4</sup>. **a.** CG model of "best" lipid-free apoA-I monomer model (15ns structure in Fig. 6). **b.** CG 15ns model in periodic box containing 10 randomly distributed monomeric POPC. **c.** Result after 20 μs CG MD simulation showing uptake of 7 CG POPC to form a "cup"-shaped lipid-poor particle. **d.** Same as (c) minus POPC.

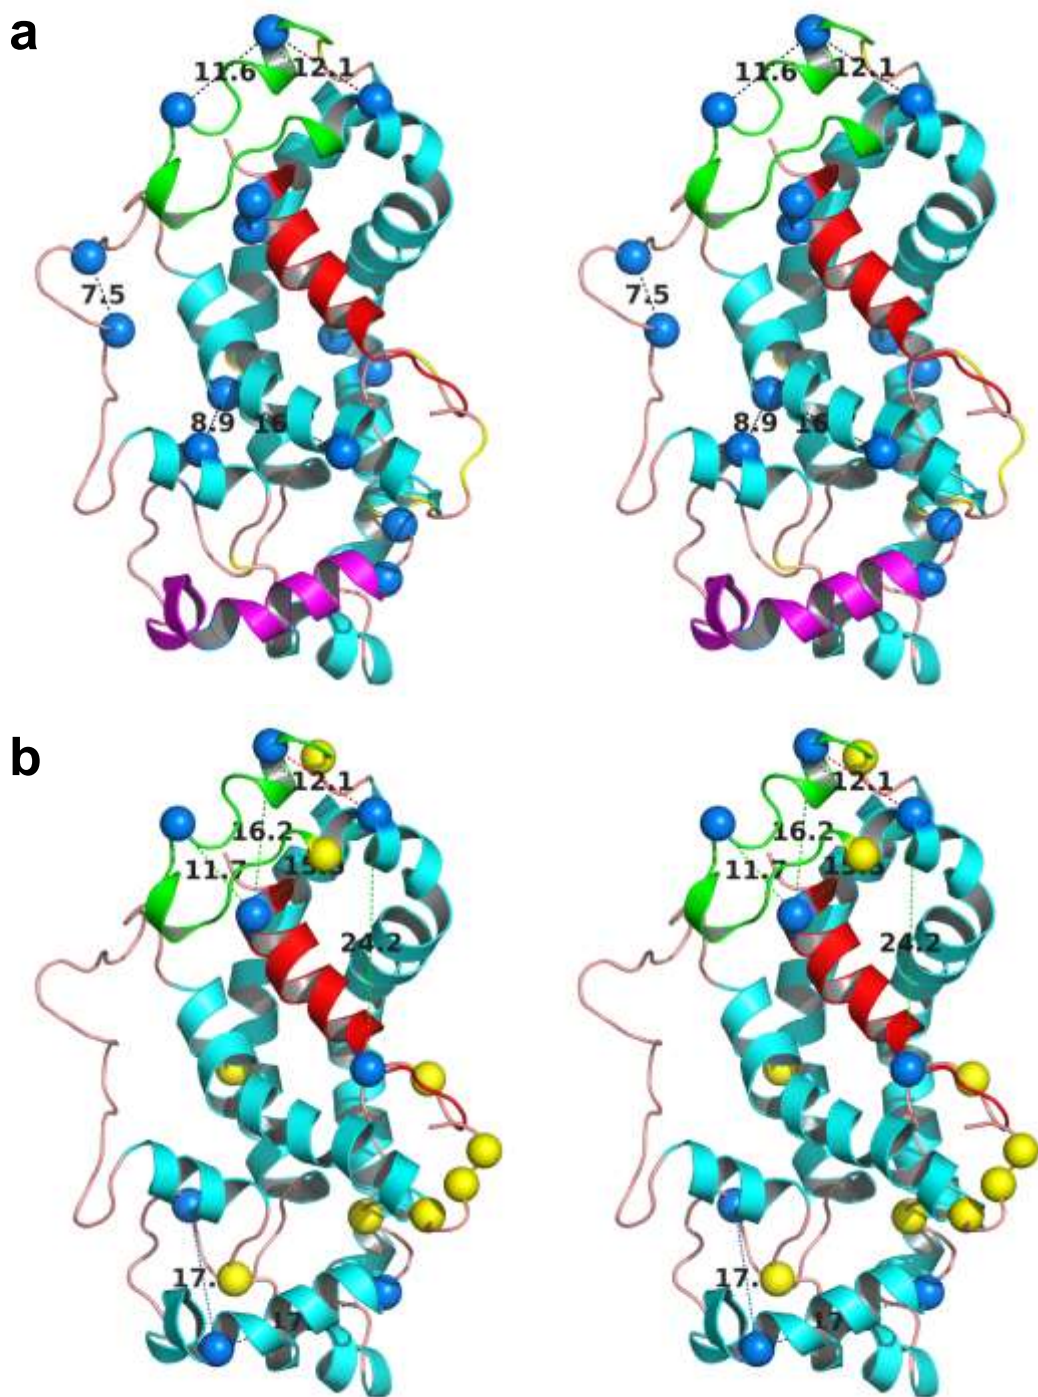

**Fig. S8. Location of key cross-links on relaxed-eyed stereo ribbons representations of the 15 ns model.** H5, green; H10, red. **a.** Five non-trivial cross-links common to Silva, et al.<sup>1</sup>, Pollard, et al.<sup>2</sup> and this study (black dotted lines). All lysine residues involved in common cross-links, blue spheres. **b.** Cross-links that define the H5-H10 contact model. All fourteen lysine residues involved in common cross-links, blue spheres. Cross-links denoting: H5 hairpin, red dotted line; H5-H10 contact, green dotted lines; Y192 loop/hairpin, blue dotted lines.



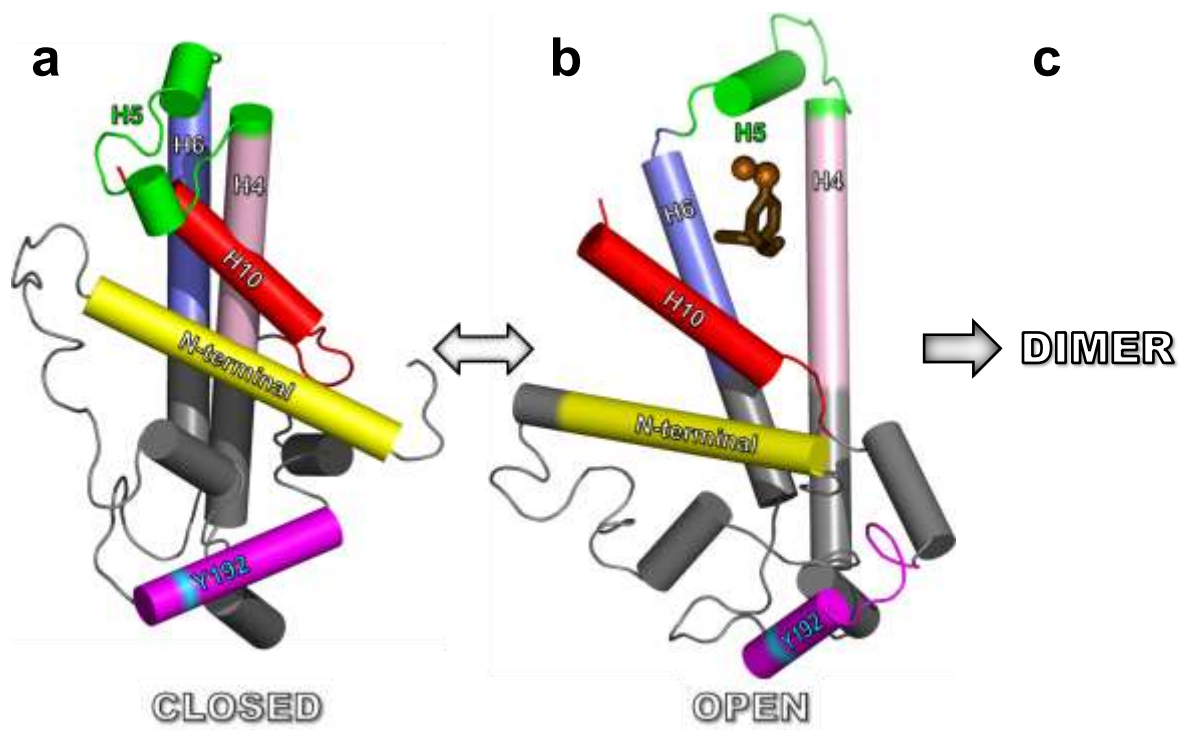

**Figure S9. Cartoon representation of a dynamic model for formation of discoidal HDL driven by the cycling of lipid-free monomeric human apoA-I between closed and open states.** H4, peach; H5, green; H6, steel blue; H10, red; N-terminal helix, yellow; Y192, cyan; Y192 loop/helix, magenta. **a.** Closed (15 ns) model. **b.** Open (20 ns) model in which the tandem helical repeats, H4, H5, H6 and H10 open to form a hydrophobic pocket called a “lipid cup”. A CG PC molecule (brown and gold) symbolizes lipid being taken up by the “lipid cup” to form lipid-poor apoA-I. **c.** Dimerization of lipid-poor apoA-I initiated through antiparallel pairwise H4-H6 hairpin interactions to form discoidal HDL.

**Table S1**  
**Comparison of Cross-links of Silva, et al <sup>1</sup> and Pollard, et al <sup>2</sup> with those of this study**

| <b>Lys1</b> | <b>Lys2</b> | <b>Silva</b> | <b>Pollard</b> | <b>This study</b> | <b>Lys1</b>  | <b>Lys2</b> | <b>Silva</b> | <b>Pollard</b> | <b>This study</b> |
|-------------|-------------|--------------|----------------|-------------------|--------------|-------------|--------------|----------------|-------------------|
| 1α          | 12          |              | y              | y                 | 94           | 226         |              |                | y                 |
| 1α          | 59          |              | y              |                   | 94           | 239         |              | y              | y                 |
| 1α          | 96          | y            |                |                   | 96           | 106         | y            | y              |                   |
| 1α          | 118         |              | y              |                   | 96           | 195         | y            |                | y                 |
| 1α          | 195         |              |                | y                 | 96           | 208         | y            |                | y                 |
| <b>12</b>   | <b>23</b>   | <b>y</b>     | <b>y</b>       | <b>y</b>          | 96           | 226         | y            |                |                   |
| 12          | 195         |              | y              |                   | 96           | 239         |              |                | y                 |
| 12          | 226         |              |                | y                 | 106          | 107         | y            |                | y                 |
| <b>23</b>   | <b>59</b>   | <b>y</b>     | <b>y</b>       | <b>y</b>          | 107          | 239         |              |                | y                 |
| 23          | 239         |              |                | y                 | 118          | 133         |              | y              | y                 |
| <b>40</b>   | <b>45</b>   | <b>y</b>     | <b>y</b>       | <b>y</b>          | <b>118</b>   | <b>140</b>  | <b>y</b>     | <b>y</b>       | <b>y</b>          |
| 40          | 59          |              | y              |                   | 118          | 195         |              |                | y                 |
| 40          | 94          |              |                | y                 | 118          | 208         |              |                | y                 |
| 40          | 118         |              | y              |                   | <b>118</b>   | <b>226</b>  |              |                | <b>y</b>          |
| 40          | 133         |              | y              | y                 | <b>118</b>   | <b>239</b>  |              |                | <b>y</b>          |
| 40          | 140         |              | y              |                   | <b>133</b>   | <b>140</b>  | <b>y</b>     | <b>y</b>       | <b>y</b>          |
| 40          | 182         |              | y              |                   | <b>133</b>   | <b>239</b>  |              |                | <b>y</b>          |
| 40          | 239         |              | y              | y                 | <b>140</b>   | <b>239</b>  |              |                | <b>y</b>          |
| 45          | 59          |              | y              |                   | <b>182</b>   | <b>195</b>  |              |                | <b>y</b>          |
| 59          | 195         |              |                | y                 | 182          | 226         |              |                | y                 |
| 59          | 239         |              |                | y                 | <b>195</b>   | <b>206</b>  |              |                | <b>y</b>          |
| 77          | 195         |              |                | y                 | 195          | 226         |              |                | y                 |
| 77          | 208         |              |                | y                 | 195          | 239         |              |                | y                 |
| 88          | 94          | y            | y              |                   | <b>206</b>   | <b>208</b>  | <b>y</b>     | <b>y</b>       | <b>y</b>          |
| 88          | 118         |              | y              |                   | 206          | 226         |              |                | y                 |
| 88          | 195         |              |                | y                 | 226          | 238         | y            |                |                   |
| <b>94</b>   | <b>96</b>   | <b>y</b>     | <b>y</b>       | <b>y</b>          | 226          | 239         |              |                | y                 |
| 94          | 208         | y            |                |                   | <b>238</b>   | <b>239</b>  | <b>y</b>     | <b>y</b>       | <b>y</b>          |
| 94          | 226         |              |                | y                 | <b>Total</b> | <b>17</b>   | <b>24</b>    | <b>41</b>      |                   |

1α, N-terminal amino group; gray shading, cross-links common to all three studies; red, evidence for H5 hairpin; green, evidence for contact of H5 with H10; blue, evidence for Y192 loop/hairpin.

## References

- [1] Silva, R. A., Hilliard, G. M., Fang, J., Macha, S., and Davidson, W. S. (2005) A three-dimensional molecular model of lipid-free apolipoprotein A-I determined by cross-linking/mass spectrometry and sequence threading, *Biochemistry* 44, 2759-2769.
- [2] Pollard, R. D., Fulp, B., Samuel, M. P., Sorci-Thomas, M. G., and Thomas, M. J. (2013) The conformation of lipid-free human apolipoprotein A-I in solution, *Biochemistry* 52, 9470-9481.
- [3] Breiter, D. R., Kanost, M. R., Benning, M. M., Wesenberg, G., Law, J. H., Wells, M. A., Rayment, I., and Holden, H. M. (1991) Molecular structure of an apolipoprotein determined at 2.5-Å resolution, *Biochemistry* 30, 603-608.
- [4] Segrest, J. P., Jones, M. K., and Cate, A. (2013) MD simulations suggest important surface differences between reconstituted and circulating spherical HDL, *J Lipid Res* 54, 2718-2732.
